# Supplementary material for: HTSstation: A Web Application and Open-Access Libraries for High-Throughput Sequencing Data Analysis
Source: PubMed Central journal article supplement (PMC3903476; doi:10.1371/journal.pone.0085879), 2014-01-27

HTSstation<sup>beta</sup> Poster | References **A**

List of analyses | List of uploads | Machines | Facilities | Params | Step lists | Currently **1** running and **0** pending analyses on the server bbcfe.pfl@gmail.com | Logout

New Mapping analysis Tutorial | Examples

Demultiplexing or Mapping key  Add data from Demultiplexing

Activate import of UNIGE/UNIL platforms

Runs  Group 1  Delete

| Run # | Facility | Machine | Run number | Lane number | Sequencing library | FASTQ or SRA URL                                                                                                     |
|-------|----------|---------|------------|-------------|--------------------|----------------------------------------------------------------------------------------------------------------------|
| Run 1 | Lausanne | C3PO    |            | 1           |                    | <a href="http://htsstation.epfl.ch/data/examples/mapseq/">http://htsstation.epfl.ch/data/examples/mapseq/</a> Delete |
| Run 2 | Lausanne | C3PO    |            | 1           |                    | <a href="http://htsstation.epfl.ch/data/examples/mapseq/">http://htsstation.epfl.ch/data/examples/mapseq/</a> Delete |

Add run in this group

Group 2  Delete

| Run # | Facility | Machine | Run number | Lane number | Sequencing library | FASTQ or SRA URL                                                                                              |
|-------|----------|---------|------------|-------------|--------------------|---------------------------------------------------------------------------------------------------------------|
| Run 1 | Lausanne | C3PO    |            | 1           |                    | <a href="http://htsstation.epfl.ch/data/examples/mapseq/">http://htsstation.epfl.ch/data/examples/mapseq/</a> |

Add run in this group

Add group of runs

Assembly  Mus musculus (mm9)

or Reference sequence [./fa./fa.gz./tar.gz] (optional)  No file chosen

**General parameters**

Analysis description  Mandatory

Email(s)  Mandatory

Config file (optional)   No file chosen

Create a GDV project

Do not execute the analysis

**Mapping options**

Map to

Discard PCR duplicates

Compute densities

Merge strands

Read extension

2) Fill in general parameters

3) Give specific options

1) Give links to raw data

©2011 EPFL, 1015 Lausanne, tel. +41 21 693 1111 Hosted by High Performance Computing Center

HTSstation<sup>beta</sup> Poster | References **B**

List of analyses | List of uploads | Machines | Facilities | Params | Step lists | Currently **1** running and **0** pending analyses on the server bbcfe.pfl@gmail.com | Logout

Results for analysis 'mouse\_ES\_KAP1\_KO'

Key: TRVhrheeTSYedoG21M56 [\[View job / groups.json\]](#)  
[Download all files \(7609 Mo unzipped\)](#)

Input details

Definition of Groups and Runs:

| Group | Run   | LIMS | Source           |
|-------|-------|------|------------------|
| KO    | Run 1 | NA   | mouse_ES_KAP1_KO |
|       | Run 2 | NA   | mouse_ES_KAP1_KO |
| WT    | Run 1 | NA   | mouse_ES_KAP1_KO |

General parameters:

|                             |                     |
|-----------------------------|---------------------|
| Assembly name               | mm9                 |
| Genome name                 | Mus musculus        |
| E-mail                      | bbcfe.pfl@gmail.com |
| Create a GDV project        | No                  |
| GDV key                     |                     |
| Do not execute the analysis | No                  |
| Find junctions              | No                  |

Results:

| Steps                                                                 | Group KO                                                                                                                                                                                                                                                                                                                                                                                                                                                           | Group WT                                                                                                                                                                          |
|-----------------------------------------------------------------------|--------------------------------------------------------------------------------------------------------------------------------------------------------------------------------------------------------------------------------------------------------------------------------------------------------------------------------------------------------------------------------------------------------------------------------------------------------------------|-----------------------------------------------------------------------------------------------------------------------------------------------------------------------------------|
| <b>qc</b><br>Download files   Load in UCSC<br>[683 Ko unzipped]       | KO_Kap1_KO_1.fastq_fastqc.zip [228 Ko] [ View ]<br>KO_Kap1_KO_2.fastq_fastqc.zip [226 Ko] [ View ]<br>[455 Ko unzipped]<br>Load in UCSC                                                                                                                                                                                                                                                                                                                            | WT_fastqc.zip [227 Ko] [ View ]<br>Load in UCSC                                                                                                                                   |
| <b>bowtie</b><br>Download files   Load in UCSC<br>[2127 Mo unzipped]  | KO_Kap1_KO_1.fastq_unmapped.fastq.gz [90 Mo]<br>KO_Kap1_KO_2.fastq_unmapped.fastq.gz [87 Mo]<br>KO_Kap1_KO_1.fastq_filter_bamstat (pickle file) [0 Ko]<br>KO_Kap1_KO_2.fastq_filter_bamstat (pickle file) [0 Ko]<br>KO_Kap1_KO_1.fastq_filtered.bam [625 Mo]<br>KO_Kap1_KO_1.fastq_filtered.bam.bai (BAM index) [3 Mo]<br>KO_Kap1_KO_2.fastq_filtered.bam [611 Mo]<br>KO_Kap1_KO_2.fastq_filtered.bam.bai (BAM index) [3 Mo]<br>[1423 Mo unzipped]<br>Load in UCSC | WT_unmapped.fastq.gz [86 Mo]<br>WT_filter_bamstat (pickle file) [0 Ko]<br>WT_filtered.bam [614 Mo]<br>WT_filtered.bam.bai (BAM index) [3 Mo]<br>[704 Mo unzipped]<br>Load in UCSC |
| <b>density</b><br>Download files   Load in UCSC<br>[2480 Mo unzipped] | KO_Kap1_KO_1.fastq.sql [0 Ko]<br>KO_Kap1_KO_2.fastq.sql [0 Ko]<br>KO_merged.bw [126 Mo]<br>KO_Kap1_KO_1.fastq_merged.sql [504 Mo]<br>KO_Kap1_KO_2.fastq_merged.sql [500 Mo]<br>[1933 Mo unzipped]<br>Load in UCSC                                                                                                                                                                                                                                                  | WT.sql [0 Ko]<br>WT_merged.bw [71 Mo]<br>WT_merged.sql [475 Mo]<br>[546 Mo unzipped]<br>Load in UCSC                                                                              |
| <b>stats</b><br>Download files   Load in UCSC<br>[39 Ko unzipped]     | KO_mapping_report.pdf [26 Ko]<br>Load in UCSC                                                                                                                                                                                                                                                                                                                                                                                                                      | WT_mapping_report.pdf [13 Ko]<br>Load in UCSC                                                                                                                                     |

Global results:

|               |                                                 |
|---------------|-------------------------------------------------|
| <b>bowtie</b> | file_names (pickle file) [0 Ko]<br>Load in UCSC |
|---------------|-------------------------------------------------|

BED file for UCSC | Load in UCSC Links for visualization

©2011 EPFL, 1015 Lausanne, tel. +41 21 693 1111 Hosted by High Performance Computing Center

HTSstation<sup>beta</sup> C  
 List of analyses | List of uploads | Machines | Facilities | Params | Step lists | Currently 1 running and 0 pending analyses on the server  
 bbcf.epfl@gmail.com | Logout

**New RNA-Seq analysis** Tutorial | Examples

Mapping key  Add data from Mapping

Activate import of UNIGE/UNIL platforms

Runs **Group 1** KO Delete

| Run #                          | BAM URL             |        |
|--------------------------------|---------------------|--------|
| <input type="checkbox"/> Run 1 | Lw6ivg23T3dl7ze2Xg4 | Delete |
| <input type="checkbox"/> Run 2 | 5zduu5ckj7qsnRvW07k | Delete |

Add run in this group

**Group 2** WT Delete

| Run #                          | BAM URL          |  |
|--------------------------------|------------------|--|
| <input type="checkbox"/> Run 1 | qCuP9m2YxYmTn23M |  |

Add run in this group

Add group of runs

Assembly  No file chosen  
 or Reference sequence [./fa./fa.gz./tar.gz] (optional) Choose File

**General parameters** 2) Fill in parameters

Analysis description  Mandatory

Email(s)  Mandatory

Config file (optional)  Upload Choose File No file chosen  
 Write content

Create a GDV project

Do not execute the analysis

**RNA-Seq options**

Find junctions

[Back](#)

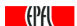

HTSstation<sup>beta</sup> D  
 List of analyses | List of uploads | Machines | Facilities | Params | Step lists | Currently 1 running and 0 pending analyses on the server  
 bbcf.epfl@gmail.com | Logout

**Results for analysis 'mouse\_ES\_KAP1\_KO'** 🔄 🗑️ 📄 ✖️

[Key: #91e82k0x5kWL0kMw0k runs.json](#) / [groups.json](#)  
[Download all files \(128 Mo unzipped\)](#)

→ [Input details](#)

**Export results: all, per analysis step or per group and per analysis step**

Results:

| Steps                                                                                      | Group KO                                                                                                                                                      | Group WT                                                                                                                                                      |
|--------------------------------------------------------------------------------------------|---------------------------------------------------------------------------------------------------------------------------------------------------------------|---------------------------------------------------------------------------------------------------------------------------------------------------------------|
| <ul style="list-style-type: none"> <li>pileup [Download files] [75 Mo unzipped]</li> </ul> | <ul style="list-style-type: none"> <li>exons_KO.bw [4 Mo]</li> <li>genes_KO.bw [463 Ko]</li> <li>genes_KO.sql [12 Mo]</li> <li>genes_KO.sql [1 Mo]</li> </ul> | <ul style="list-style-type: none"> <li>exons_WT.bw [4 Mo]</li> <li>genes_WT.bw [452 Ko]</li> <li>genes_WT.sql [11 Mo]</li> <li>genes_WT.sql [1 Mo]</li> </ul> |

Global results:

|                                                                                                                                                                                                                                        |                                                                                                                                                                                                                                                                |
|----------------------------------------------------------------------------------------------------------------------------------------------------------------------------------------------------------------------------------------|----------------------------------------------------------------------------------------------------------------------------------------------------------------------------------------------------------------------------------------------------------------|
| <ul style="list-style-type: none"> <li>pileup               <ul style="list-style-type: none"> <li>exons_expression.tab [27 Mo]</li> <li>genes_expression.tab [2 Mo]</li> <li>transcripts_expression.tab [8 Mo]</li> </ul> </li> </ul> | <ul style="list-style-type: none"> <li>stats               <ul style="list-style-type: none"> <li>exons_differential_KO-WT.txt [37 Mo]</li> <li>genes_differential_KO-WT.txt [4 Mo]</li> <li>transcripts_differential_KO-WT.txt [10 Mo]</li> </ul> </li> </ul> |
|----------------------------------------------------------------------------------------------------------------------------------------------------------------------------------------------------------------------------------------|----------------------------------------------------------------------------------------------------------------------------------------------------------------------------------------------------------------------------------------------------------------|

**MA-plot**

|                        |                                                                                                                                                                                                                                   |
|------------------------|-----------------------------------------------------------------------------------------------------------------------------------------------------------------------------------------------------------------------------------|
| Level                  | <input checked="" type="radio"/> Genes<br><input type="radio"/> Transcripts<br><input type="radio"/> Exons                                                                                                                        |
| Normalization          | <input checked="" type="radio"/> Raw<br><input type="radio"/> RPKM                                                                                                                                                                |
| Choose runs to compare | Reference: <input checked="" type="checkbox"/> KO.1 <input type="checkbox"/> KO.2 <input type="checkbox"/> WT.1<br>Compared: <input type="checkbox"/> KO.1 <input type="checkbox"/> KO.2 <input checked="" type="checkbox"/> WT.1 |

[BED file for UCSC](#) | [Load in UCSC](#)

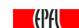

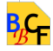

BBCFtools  
→ HTSstation

New analysis

Pipeline builder

Demultiplexing  
Mapping

4C-seq  
Chip-seq  
RNA-seq  
SNP

Post-processing

OPERATIONS

Visualization

### RNA-Seq MAplot for mouse\_ES\_KAP1\_KO

Conditions:  
x1: counts - KO.1  
x2: counts - WT.1

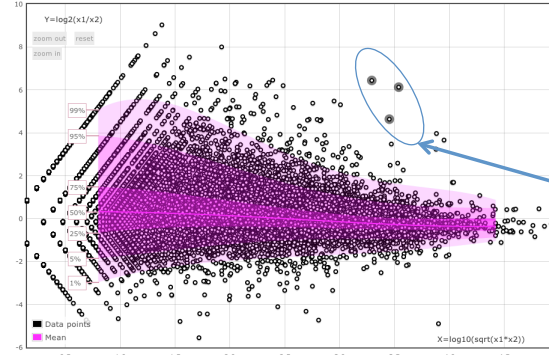

Click on genes you are interested in to select them.  
Mouse hovers at [0.98, 11.84].

Selected features: [Unselect all]

| Feature name                 | p-value         |
|------------------------------|-----------------|
| ENSMUSG000000031503 Ccl4a2   | 0.0000000000e+0 |
| ENSMUSG000000031502 Ccl4a1   | 0.0000000000e+0 |
| ENSMUSG000000070436 Serpinh1 | 0.0000000000e+0 |

Find gene:

Select surrounding features within  
x +/-  and y +/-

Select or search features on the plot and visualize their related information

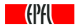

Supplement: pone.0085879.s002.pdf [file pone.0085879.s002.pdf]
